# Supplementary figures and images for: Effectiveness of Switching From Antipsychotic Polypharmacy to Monotherapy
Source: Atypon-hosted journal article supplement (doi:10.1176/appi.ajp.2011.10060908), 2011-05-02

### Recruitment Flow for Effectiveness of Switching: Polypharmacy to Monotherapy

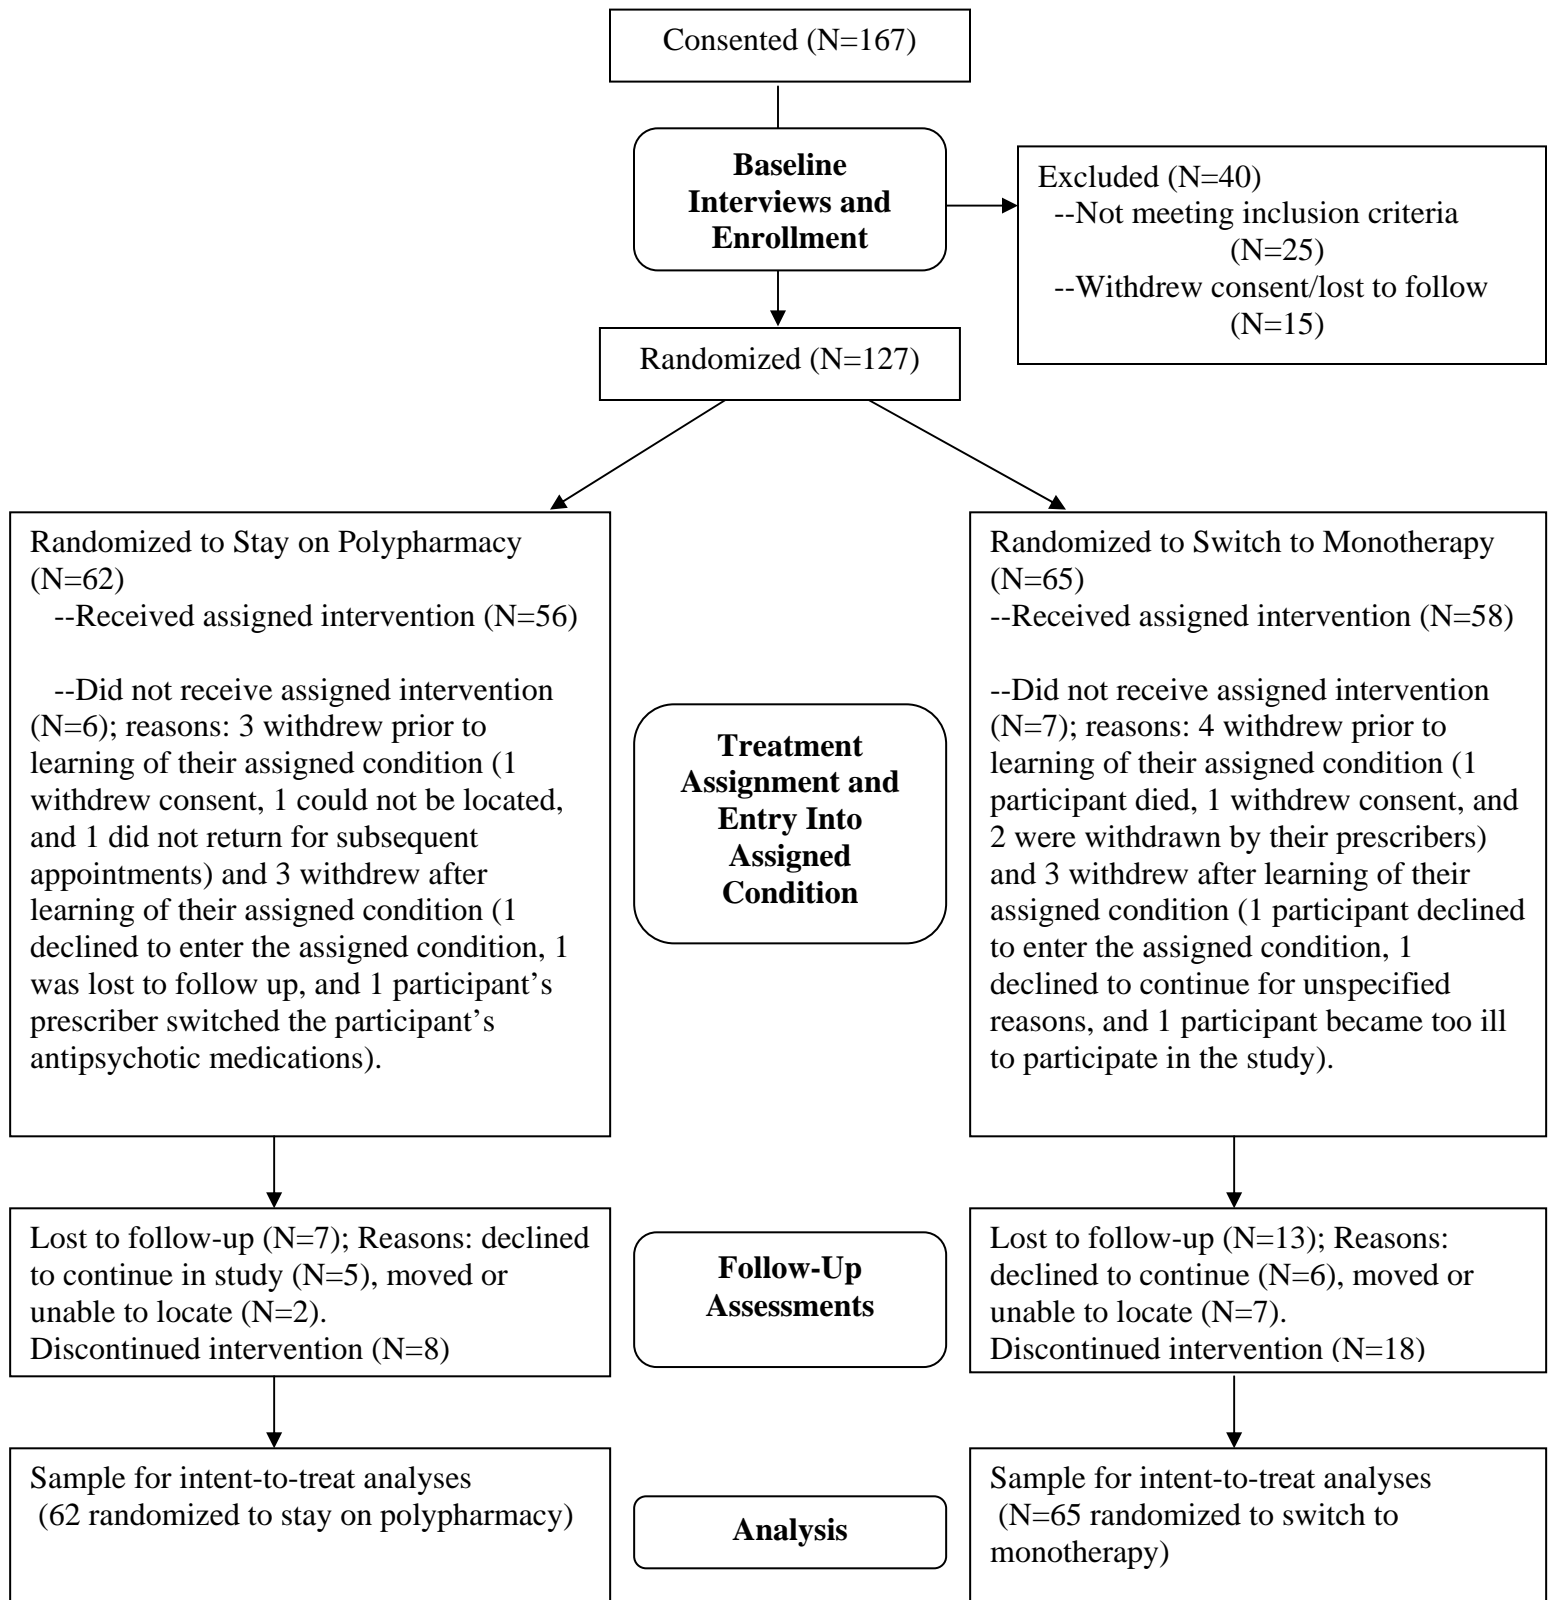

Supplement: ajp_168_07_702_01.pdf [file ajp_168_07_702_01.pdf]
